# Supplementary material
Source: PubMed Central journal article supplement (PMC8849574)

# Figure Ext Data 1

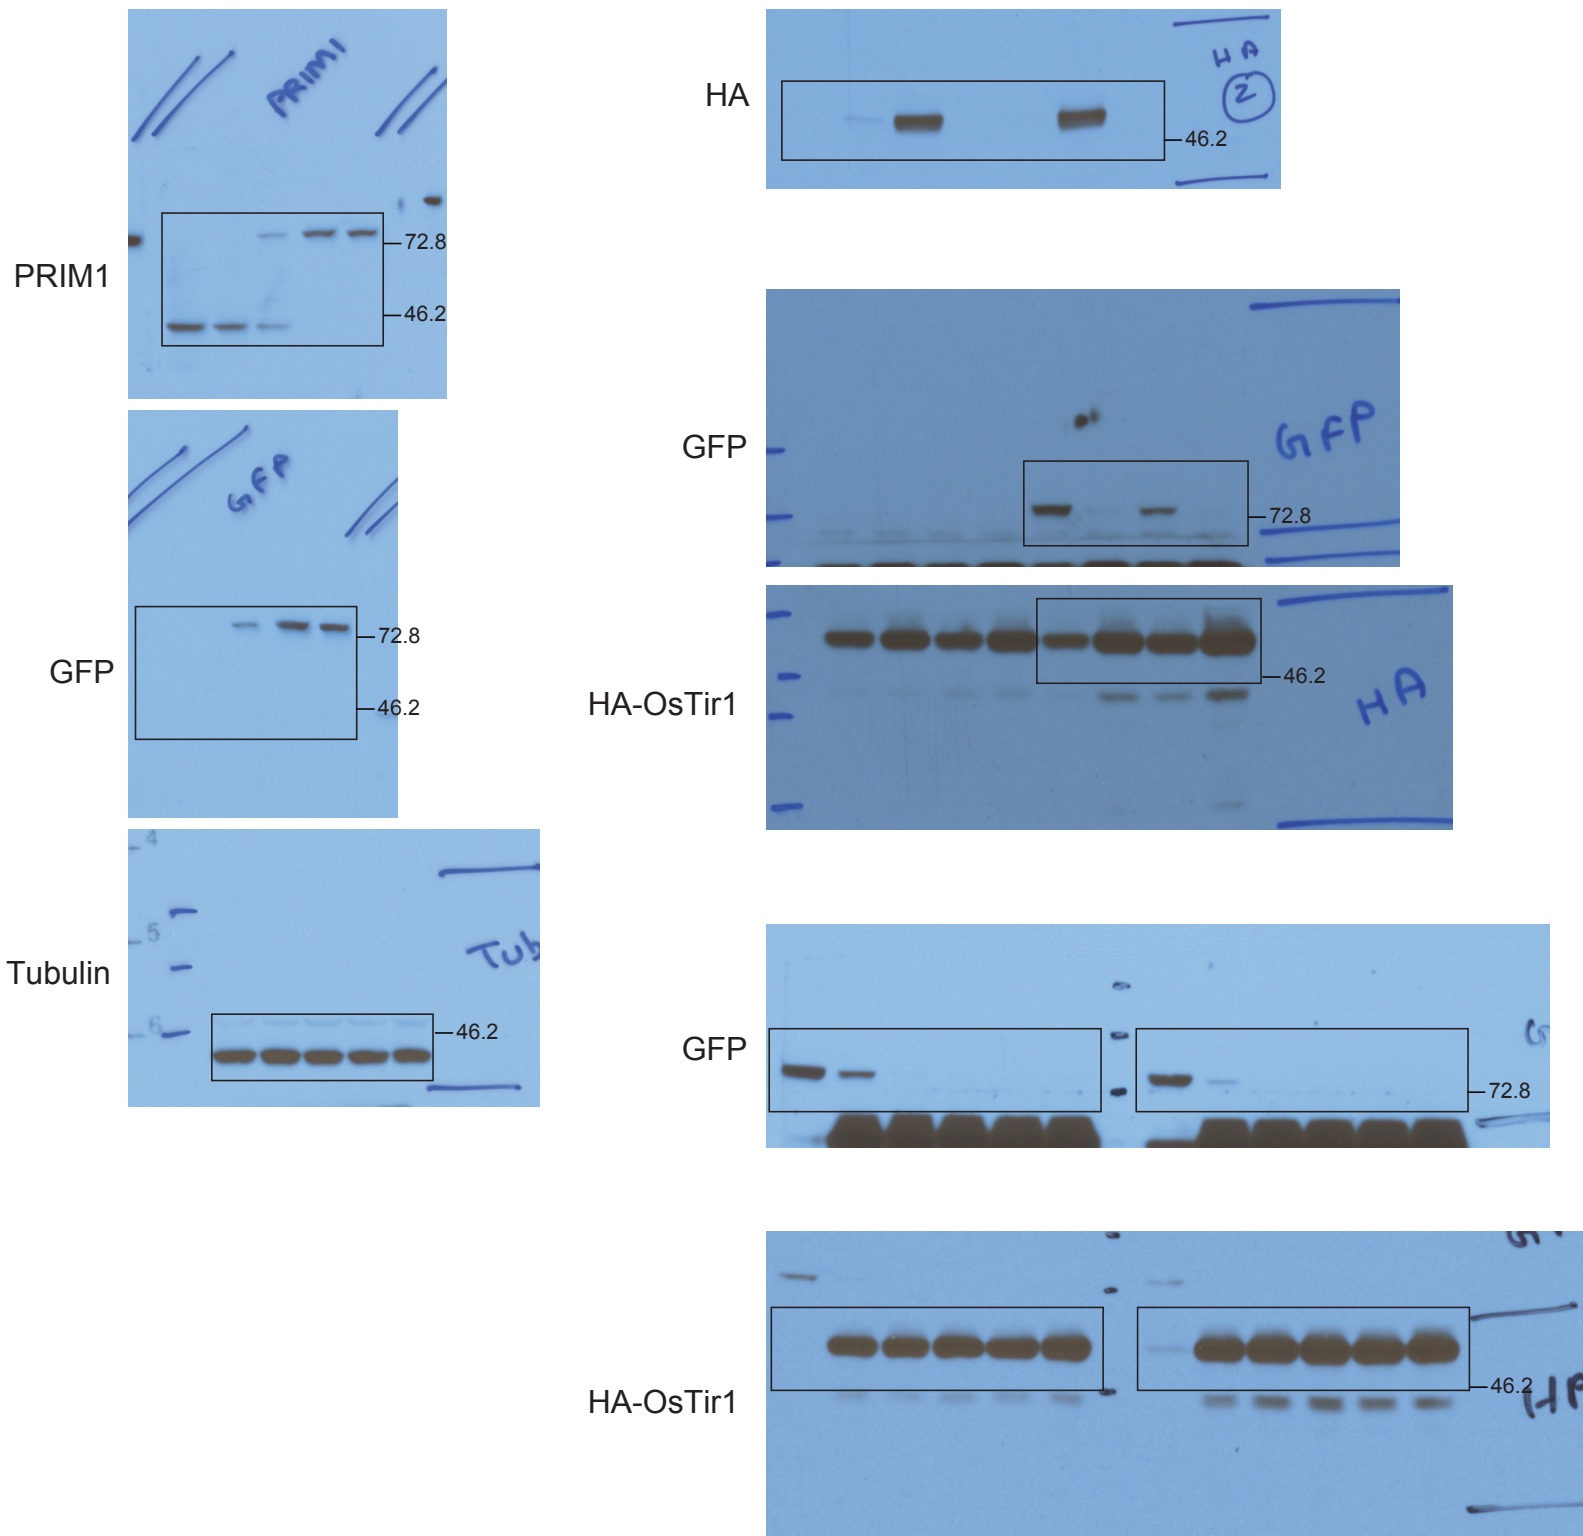

Supplement: NIHMS1755181-supplement-Unprocessed_Blots_Ext_Data_1.pdf [file NIHMS1755181-supplement-Unprocessed_Blots_Ext_Data_1.pdf]

## Figure Ext Data 4

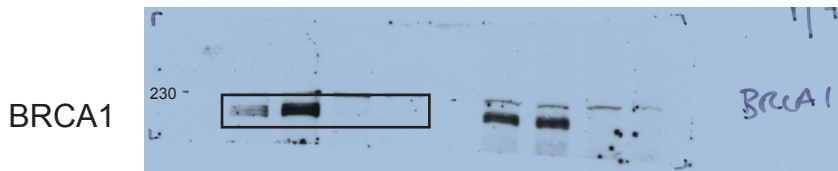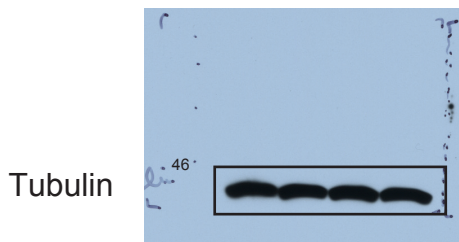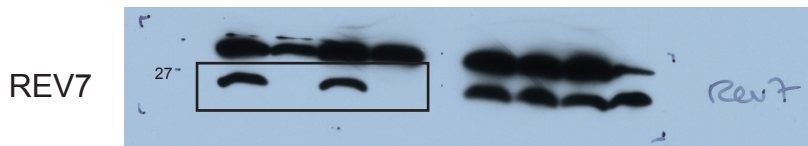

Supplement: NIHMS1755181-supplement-Unprocessed_Blots_Ext_Data_4.pdf [file NIHMS1755181-supplement-Unprocessed_Blots_Ext_Data_4.pdf]

**Figure 5**

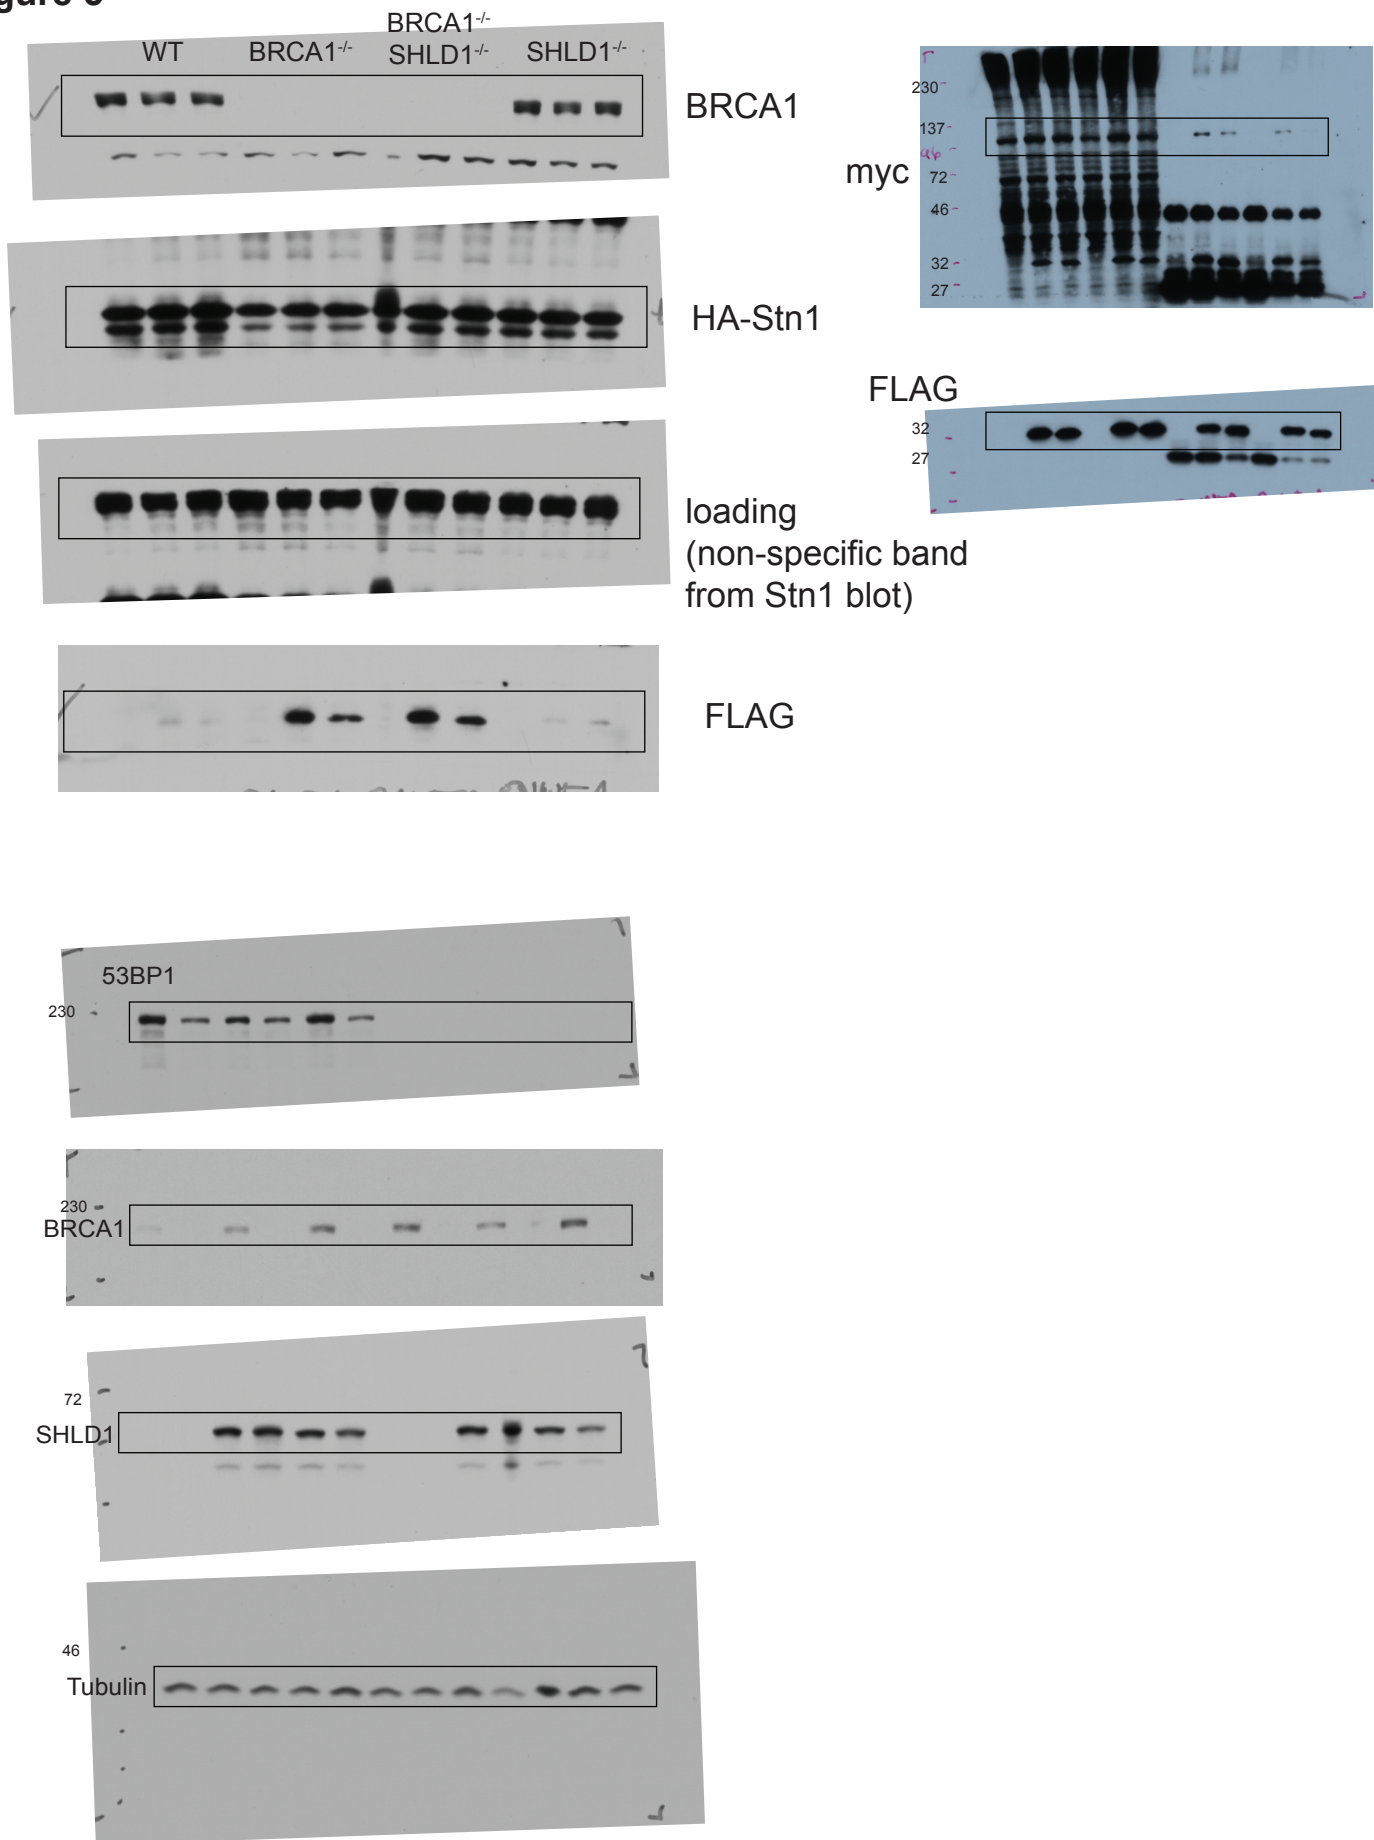

Supplement: NIHMS1755181-supplement-Unprocessed_Blots_Fig_5.pdf [file NIHMS1755181-supplement-Unprocessed_Blots_Fig_5.pdf]

# Figure Ext Data 8

53BP1

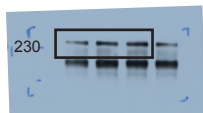

SNAP

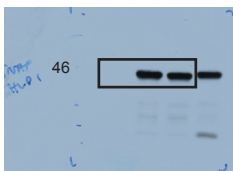

Tubulin

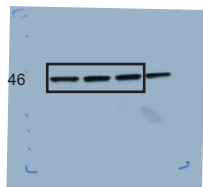

myc

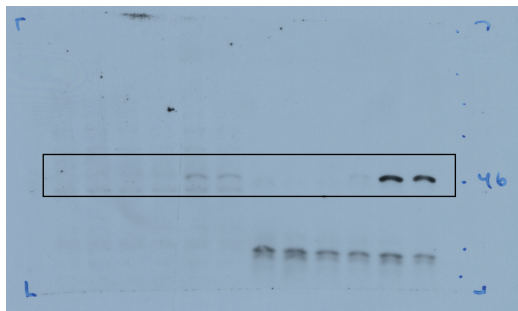

myc (long)

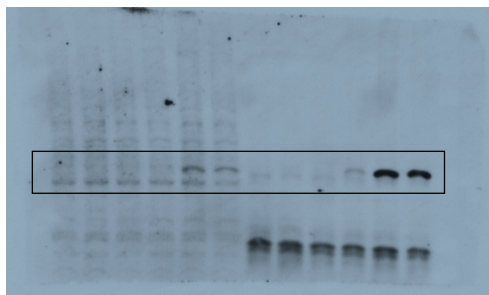

SNAP

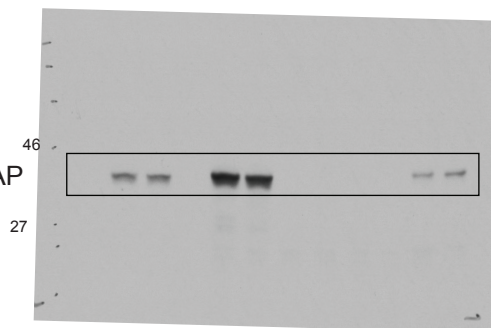

Supplement: NIHMS1755181-supplement-Unprocessed_blots_Ext_Data_8.pdf [file NIHMS1755181-supplement-Unprocessed_blots_Ext_Data_8.pdf]

# Figure 1

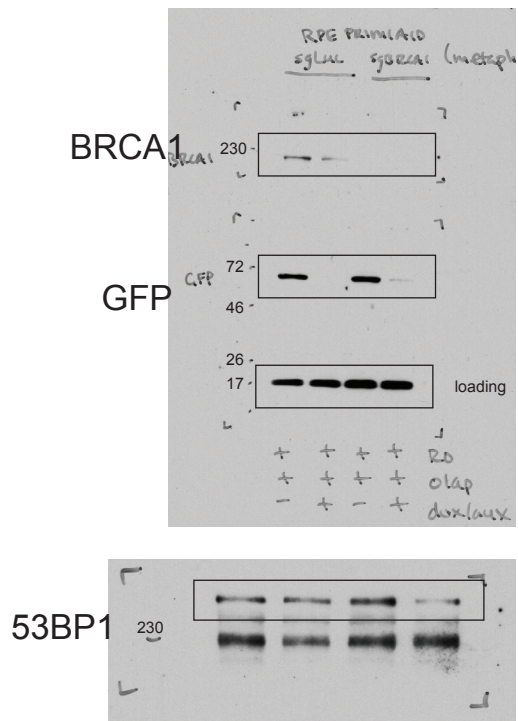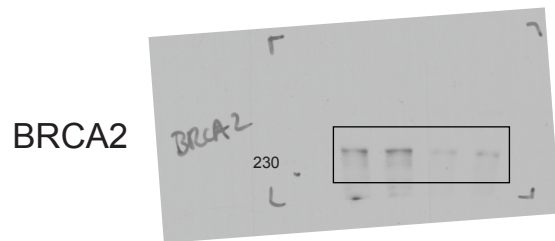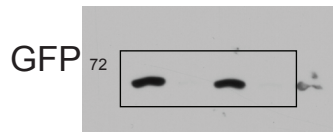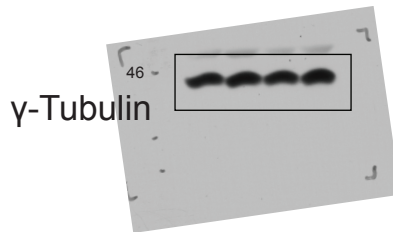

Supplement: NIHMS1755181-supplement-Unprocessed_blots_Fig_1.pdf [file NIHMS1755181-supplement-Unprocessed_blots_Fig_1.pdf]

## Figure 2

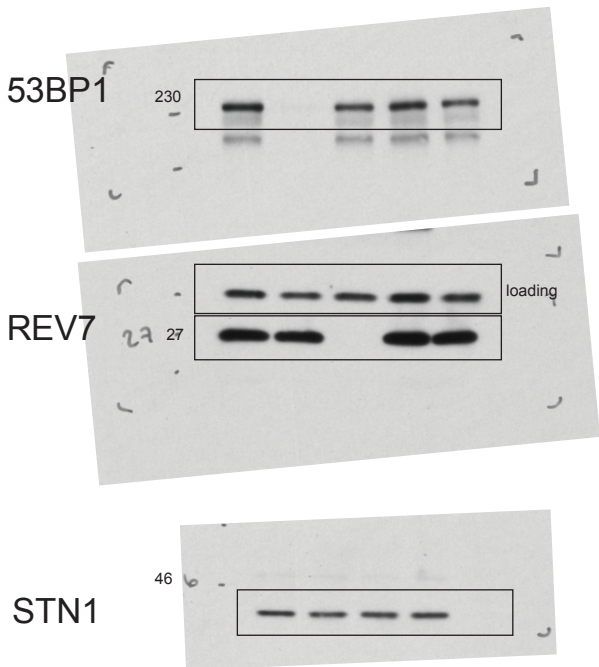

Supplement: NIHMS1755181-supplement-Unprocessed_blots_Fig_2.pdf [file NIHMS1755181-supplement-Unprocessed_blots_Fig_2.pdf]
